# Supplementary material for: Effects of Dexmedetomidine on Postoperative Nausea and Vomiting in Adult Patients Undergoing Ambulatory Thyroidectomy: A Randomized Clinical Trial
Source: Frontiers journal article supplement (doi:10.3389/fmed.2021.781689), 2021-12-13
Supplement: Table_1.XLS [file Table_1.XLS]

## Sheet: Sheet1
Group	Sex	Age	ASA	Height（cm）	Weight（kg）	BMI	Baseline blood pressure（mmHg）	Baseline heart rate（bpm）	Risk factors	Propofol consumption（mL）	Propofol consumption（mg）	Sufentanil consumption(ug)	Remifentanilconsumption（mL）	Remifentanilconsumption（ug）	Hypotension	Bradycardia	Atropine consumption （mg）	Ephedrine consumption（mg）	Operation time （min）	Anesthesia time （min）	PACU RSS score	PACU VAS score	6h episodes of vomiting	6h episodes of nausea	6h Degree of nausea	6h VAS score	24h episodes of vomiting	24h episodes of nausea	24h Degree of nausea	24h VAS score	Rescue antiemetics	Rescue analgesics
DEX+AZA	F	32	1	163	65	24.46	126/85	73	NO	67.5	675	30	12	600	NO	NO	0	0	85	100	2	0	0	0	0	1	0	0	0	0	/	/
DEX+AZA	F	28	1	152	52	22.51	112/84	83	NO	42	420	35	11.8	590	NO	NO	0	0	75	92	2	0	0	0	0	2	0	0	0	2	/	/
DEX+AZA	F	53	2	163	60	22.58	125/79	68	NO	40	400	35	8.5	425	NO	NO	0	0	53	71	5	2	0	0	0	0	0	0	0	0	/	/
DEX+AZA	F	37	1	159	58	22.94	107/72	63	Motion sickness	41	410	20	12	600	NO	NO	0	0	76	85	2	0	1	0	0	2	1	0	0	0	10 mg metoclopramide hydrochloride	/
DEX+AZA	M	46	2	168	67	23.74	116/72	86	Motion sickness	50	500	40	11	550	NO	YES(57bpm)	0.3	0	75	93	1	1	0	0	0	3	0	0	0	3	/	Parecoxib sodium 40 mg
DEX+AZA	M	48	2	169	75	26.26	124/80	76	Motion sickness	63	630	40	12.1	605	NO	NO	0	0	74	86	2	1	0	0	0	0	0	0	0	2	/	/
DEX+AZA	F	53	2	164	77	28.63	120/74	72	NO	60	600	40	14	700	NO	NO	0	0	78	97	2	1	0	1	mild	0	0	0	0	3	/	/
DEX+AZA	F	25	1	157	65	26.37	100/63	69	Motion sickness	60	600	35	14	700	NO	NO	0	0	87	95	2	0	0	2	severe	2	0	1	mild	2	10 mg metoclopramide hydrochloride	/
DEX+AZA	M	30	2	180	84	25.93	123/83	80	NO	52	520	35	9.8	490	NO	NO	0	0	56	73	5	1	0	0	0	0	0	0	0	1	/	/
DEX+AZA	F	38	2	164	65	24.17	117/82	69	Motion sickness	49	490	35	13.3	665	NO	NO	0	0	84	99	2	2	0	0	0	2	0	1	severe	0	10 mg metoclopramide hydrochloride	/
DEX+AZA	F	29	1	158	53	21.23	117/62	75	Motion sickness	58	580	35	14	700	NO	NO	0	0	98	109	2	1	0	2	mild	0	0	0	0	2	/	/
DEX+AZA	F	38	2	157	57	23.12	108/65	62	Motion sickness/ smoker	61	610	40	14.6	730	NO	NO	0	0	96	115	2	1	0	0	0	3	0	0	0	0	/	/
DEX+AZA	F	35	1	162	57	21.72	116/75	75	Motion sickness	88.5	885	35	32.7	1635	NO	NO	0	0	113	125	2	1	0	1	mild	0	0	0	0	2	/	/
DEX+AZA	F	50	2	165	60	22.04	128/78	65	NO	53	530	30	11.6	580	NO	NO	0	0	70	87	2	0	0	0	0	2	0	0	0	0	/	/
DEX+AZA	F	57	2	165	66	24.24	123/74	72	NO	73	730	35	17.8	890	NO	NO	0	0	123	138	2	0	0	0	0	2	0	0	0	1	/	/
DEX+AZA	F	56	2	156	65	26.71	108/62	65	NO	54	540	30	11	550	NO	NO	0	0	75	83	2	2	0	0	0	1	0	0	0	2	/	/
DEX+AZA	F	31	2	159	52	20.57	122/98	68	Motion sickness	50	500	30	11	550	NO	NO	0	0	62	80	2	0	0	0	0	2	0	0	0	1	/	/
DEX+AZA	F	40	1	161	56	21.6	104/73	74	NO	38	380	30	8.6	430	NO	NO	0	0	52	65	5	0	0	0	0	3	0	0	0	2	/	/
DEX+AZA	F	41	2	156	47	19.31	130/78	95	NO	36	360	30	9.8	490	NO	NO	0	0	77	90	2	0	1	1	severe	0	0	0	0	0	10 mg metoclopramide hydrochloride	/
DEX+AZA	M	54	2	170	70	24.22	128/83	65	NO	63.2	632	35	12.3	615	NO	NO	0	12	75	127	2	1	0	0	0	0	2	0	0	0	10 mg metoclopramide hydrochloride	/
DEX+AZA	M	55	2	166	76	27.58	132/88	72	NO	38	380	35	6	300	NO	NO	0	0	40	56	2	0	0	0	0	2	1	1	severe	3	10 mg metoclopramide hydrochloride	/
DEX+AZA	F	25	2	157	48	19.47	117/82	86	NO	54	540	30	14.8	740	NO	YES(55bpm)	0.3	0	93	104	3	2	0	0	0	1	0	0	0	2	/	/
DEX+AZA	F	54	2	156	48	19.72	139/89	77	Motion sickness	36	360	30	10	500	NO	NO	0	0	62	72	5	0	0	0	0	1	0	0	0	2	/	/
DEX+AZA	F	34	2	166	70	25.4	132/85	75	NO	91	910	40	23.2	1160	NO	NO	0	0	173	188	2	0	0	0	0	1	0	0	0	3	/	Parecoxib sodium 40 mg
DEX+AZA	F	34	2	160	68	26.56	118/76	68	NO	53	530	35	8.2	410	NO	YES(59bpm)	0.2	0	58	68	2	1	0	0	0	1	0	0	0	3	/	/
DEX+AZA	M	56	2	175	70	22.86	142/86	93	Motion sickness	68	680	40	17.3	865	NO	NO	0	0	110	122	2	0	0	1	轻	0	0	0	0	0	/	/
DEX+AZA	F	30	1	167	55	19.72	126/92	73	NO	38	380	30	7.3	365	NO	NO	0	0	58	72	3	1	0	0	0	1	0	0	0	1	/	/
DEX+AZA	M	41	2	173	83	27.73	106/70	73	Motion sickness/ smoker	72	720	35	15	750	NO	NO	0	0	115	135	2	0	0	0	0	1	0	0	0	2	/	/
DEX+AZA	F	59	2	155	54	22.48	118/79	82	Motion sickness	53	530	30	11.5	575	NO	NO	0	0	90	104	2	2	0	0	0	1	0	1	mild	2	/	/
DEX+AZA	F	33	1	159	51	20.17	128/77	83	NO	34	340	30	5.9	295	NO	NO	0	0	52	68	2	0	0	0	0	1	0		0	1	/	/
DEX+AZA	F	29	1	160	68	26.56	137/91	99	NO	109	1090	45	30.6	1530	NO	NO	0	0	198	211	2	1	0	0	0	0	0	0	0	2	/	/
DEX+AZA	M	30	2	180	62	19.14	125/85	95	NO	61	610	30	12.8	640	NO	NO	0	6	98	118	2	0	0	0	0	0	0	0	0	2	/	/
DEX+AZA	F	59	2	160	58	22.66	127/79	85	NO	67	670	30	14	700	YES(87/55mmHg）	NO	0	18	121	138	2	0	0	1	severe	0	0	0	0	3	10 mg metoclopramide hydrochloride	/
DEX+AZA	F	31	2	157	60	24.34	135/78	90	Motion sickness	41	410	30	5.4	270	NO	NO	0	0	47	68	3	2	0	0	0	1	3	1	mild	2	10 mg metoclopramide hydrochloride	/
DEX+AZA	F	35	2	155	50	20.81	116/75	88	Motion sickness	88	880	35	18.6	930	NO	NO	0	0	225	232	2	0	0	0	0	0	0	0	0	1	/	/
DEX+AZA	F	33	2	163	52	19.57	126/83	73	NO	52	520	30	7.6	380	NO	NO	0	0	64	80	2	2	0	0	0	1	0	0	0	1	/	/
DEX+AZA	F	33	2	162	68	25.91	118/79	85	NO	39	390	35	6	300	NO	NO	0	0	54	67	2	0	0	0	0	1	2		0	2	10 mg metoclopramide hydrochloride	/
DEX+AZA	F	48	2	168	70	24.8	145/86	65	Motion sickness	43	430	30	8.2	410	NO	NO	0	0	59	70	3	1	0	0	0	2	0	1	severe	3	10 mg metoclopramide hydrochloride	Parecoxib sodium 40 mg
DEX+AZA	F	28	2	163	52	19.57	117/78	81	Motion sickness	47	470	30	10.3	515	NO	NO	0	0	81	91	2	2	1	0	0	1	1		0	3	/	/
DEX+AZA	F	36	2	160	62	24.22	107/74	66	NO	50	500	30	7.6	380	NO	NO	0	0	70	85	2	1	0	0	0	3	0	0	0	2	/	/
DEX+AZA	F	25	1	162	52	19.81	121/76	90	NO	42	420	30	7.8	390	NO	NO	0	0	65	84	3	0	0	0	0	2	0	0	0	3	/	/
DEX+AZA	F	56	2	155	65	27.06	136/72	72	NO	64	640	30	12.9	645	NO	NO	0	0	91	106	2	0	0	0	0	1	0	0	0	1	/	/
DEX+AZA	F	58	2	167	65	23.31	107/83	68	Motion sickness	67.3	673	25	13.3	665	NO	NO	0	0	104	117	2	0	0	0	0	2	0	0	0	2	/	/
DEX+AZA	F	37	2	165	78	28.65	118/75	89	Motion sickness	60.6	606	30	12.3	615	NO	NO	0	0	75	87	3	0	1	0	0	2	0	0	0	2	/	/
DEX+AZA	F	56	2	155	55	22.89	143/84	80	NO	60	600	30	8	400	NO	NO	0	0	57	72	2	0	0	0	0	0	0	0	0	1	/	/
DEX+AZA	F	56	2	165	61	22.41	130/81	75	NO	56.6	566	20	8.5	425	NO	NO	0	9	86	98	2	1	1	1	mild	3	1	0	0	3	10 mg metoclopramide hydrochloride	Parecoxib sodium 40 mg
DEX+AZA	F	51	2	160	56	21.88	161/88	80	Motion sickness	59.9	599	30	12.1	605	NO	NO	0	0	90	105	3	2	0	0	0	1	0	0	0	3	/	/
DEX+AZA	M	32	2	170	75	25.95	139/96	98	NO	59	590	35	9.4	470	NO	NO	0	0	71	84	2	0	0	0	0	1	0	0	0	1	/	/
DEX+AZA	F	54	2	160	63	24.61	136/71	78	Motion sickness	36	360	25	7.1	355	NO	NO	0	0	51	61	2	2	0	0		0	3	1	severe	2	10 mg metoclopramide hydrochloride	/
DEX+AZA	F	49	2	160	56	21.88	135/92	76	Motion sickness	81	810	40	20.3	1015	NO	NO	0	0	106	113	2	0	1	0	0	3	0	0	0	2	/	/
DEX+AZA	F	34	1	160	52	20.31	117/78	82	NO	63	630	35	12.1	605	NO	NO	0	0	86	98	2	0	0	0	0	0	2	1	mild	1	10 mg metoclopramide hydrochloride	/
DEX+AZA	M	43	2	178	72	22.72	136/86	81	Smoker	82	820	40	18.1	905	NO	NO	0	0	110	127	2	0	0	0	0	1	0	1	severe	2	10 mg metoclopramide hydrochloride	/
DEX+AZA	F	51	2	165	60	22.04	136/90	80	Motion sickness	60	600	35	13.4	670	NO	NO	0	0	85	104	2	0	0	0	0	1	0	0	0	3	/	/
DEX+AZA	F	30	1	171	62	21.2	110/77	86	Motion sickness	82	820	35	15.5	775	NO	NO	0	0	117	144	2	1	0	0	0	2	0	0	0	2	/	/
DEX+AZA	F	48	2	158	53	21.23	133/74	71	NO	41	410	30	6	300	NO	NO	0	0	38	51	2	1	0	0	0	0	0	0	0	1	/	/
DEX+AZA	M	42	2	165	80	29.38	136/105	83	Motion sickness/ smoker	54	540	35	11.5	575	NO	NO	0	0	59	70	3	0	0	0	0	1	0	0	0	2	/	/
DEX+AZA	F	40	2	160	67	26.17	119/85	87	Motion sickness	51	510	30	9	450	NO	NO	0	0	67	82	2	0	0	0	0	1	0	0	0	2	/	/
DEX+AZA	M	58	2	165	62	22.77	149/94	89	NO	72.4	724	35	13.7	685	NO	NO	0	0	99	121	2	0	0	0	0	1	0	0	0	1	/	/
DEX+AZA	F	40	2	164	65	24.17	105/72	90	NO	54	540	30	9.9	495	NO	NO	0	0	79	97	2	0	0	0	0	2	0	0	0	3	/	/
DEX+AZA	M	50	2	170	72	24.91	132/88	98	NO	61	610	35	10.9	545	NO	NO	0	0	74	87	2	2	0	0	0	2	0	0	0	3	/	Parecoxib sodium 40 mg
DEX+AZA	F	42	2	159	53	20.96	106/79	84	NO	76	760	35	12.5	625	NO	NO	0	0	90	98	2	0	0	0	0	2	0	0	0	1	/	/
DEX+AZA	F	52	2	164	55	20.45	125/94	84	Motion sickness	41.4	414	30	9.6	480	YES(85/60mmHg）	NO	0	12	72	97	3	1	0	0	0	1	0	0	0	1	/	/
DEX+AZA	M	49	2	171	78	26.67	106/70	78	Smoker	62	620	30	14	700	NO	NO	0	0	85	100	2	0	0	0	0	1	0	0	0	1	/	/
DEX+AZA	F	45	2	156	52	21.37	117/78	84	NO	72.9	729	35	14.2	710	NO	NO	0	0	105	125	2	2	1	1	severe	2	0	0	0	2	10 mg metoclopramide hydrochloride	/
DEX+AZA	F	54	2	160	62	24.22	138/86	78	Motion sickness	50	500	30	9.4	470	NO	YES(56bpm)	0.3	0	72	85	2	0	0	0	0	1	0	0	0	1	/	/
DEX+AZA	F	56	2	160	55	21.48	147/75	84	NO	51.8	518	30	13.1	655	NO	NO	0	6	74	94	2	1	0	0	0	1	0	0	0	1	/	/
DEX+AZA	F	38	2	160	51	19.92	123/79	100	NO	59	590	30	10	500	NO	NO	0	0	74	96	2	1	0	0	0	2	0	0	0	3	/	/
DEX+AZA	M	35	2	171	71	24.28	137/93	71	NO	68	680	40	12.6	630	NO	NO	0	0	85	103	2	1	0	0	0	0	0	1	severe	1	10 mg metoclopramide hydrochloride	/
DEX+AZA	M	50	2	164	62	23.05	118/80	69	NO	52	520	35	10.5	525	NO	YES(56bpm)	0.3	0	73	84	2	0	0	0	0	2	0	0	0	2	/	/
DEX+AZA	F	27	1	165	52	19.1	114/82	70	NO	83	830	40	11.3	565	NO	NO	0	0	161	179	3	2	0	0	0	3	0	1	severe	2	10 mg metoclopramide hydrochloride	/
DEX+AZA	F	55	2	168	68	24.09	145/82	84	NO	56	560	30	8	400	NO	NO	0	0	67	88	2	2	1	0	0	3	0	0	0	1	/	/
DEX+AZA	F	54	2	154	60	25.3	114/87	80	NO	69	690	30	9.3	465	NO	NO	0	0	116	126	2	0	0	0	0	2	0	0	0	2	/	/
DEX+AZA	F	60	2	155	65	27.06	137/92	97	NO	67.4	674	35	13.8	690	NO	YES(51bpm)	0.3	0	98	116	2	2	0	0	0	1	1	0	0	1	/	/
DEX+AZA	F	54	2	162	60	22.86	152/97	91	Motion sickness	71	710	35	18.4	920	NO	NO	0	0	115	132	2	0	0	0	0	2		1	mild	2	/	/
DEX+AZA	F	49	2	157	55	22.31	107/59	81	NO	59	590	25	9.8	490	NO	NO	0	0	59	94	2	1	0	0	0	2	0	0	0	2	/	/
DEX+AZA	F	29	1	161	66	25.46	119/77	71	NO	55.5	555	30	10.5	525	NO	NO	0	0	85	101	5	0	0	0	0	1	0	0	0	2	/	/
DEX+AZA	F	44	2	160	63	24.61	124/79	82	Motion sickness	47.5	475	30	8.7	435	NO	NO	0	0	77	91	2	1	0	0	0	1	0	0	0	1	/	/
DEX+AZA	M	28	2	175	80	26.12	135/88	89	Motion sickness	63	630	35	11.6	580	NO	NO	0	0	66	101	3	0	0	0	0	1	0	0	0	2	/	/
DEX+AZA	F	55	2	160	65	25.39	135/77	87	Motion sickness	67	670	40	14.4	720	NO	NO	0	0	95	118	2	1	0	0	0	0	2	1	severe	1	10 mg metoclopramide hydrochloride	/
DEX+AZA	M	55	2	170	65	22.49	125/86	71	Smoker	64	640	30	10.5	525	NO	NO	0	0	88	109	2	1	0	0	0	2	0	0	0	3	/	/
DEX+AZA	M	48	2	168	65	23.03	131/95	99	Motion sickness	73	730	40	15.8	790	NO	NO	0	0	153	173	2	2	1	0	0	2	1	0	0	1	10 mg metoclopramide hydrochloride	/
DEX+AZA	F	58	2	162	65	24.77	140/87	71	Motion sickness	70.1	701	35	15.8	790	NO	NO	0	0	113	136	5	0	0	0	0	1	0	0	0	2	/	/
DEX+AZA	M	46	2	170	77	26.64	135/87	67	NO	63	630	40	8.9	445	NO	NO	0	0	74	93	2	0	0	0	0	2	0	0	0	1	/	/
DEX+AZA	M	58	2	166	80	29.03	138/83	72	Smoker	70	700	35	14.1	705	NO	NO	0	0	89	103	2	0	0	0	0	1	0	0	0	1	/	/
AZA	F	48	1	168	80	28.34	133/85	72	NO	56	560	35	13	650	NO	NO	0	0	74	89	2	2	0	0	0	3	0	0	0	3	/	/
AZA	M	47	2	161	57	21.99	103/72	65	Smoker	45	450	35	11.1	555	NO	NO	0	0	67	86	2	0	0	1	mild	0	2	0	0	2	10 mg metoclopramide hydrochloride	/
AZA	F	50	2	159	57	22.55	123/78	65	NO	48	480	30	12	600	NO	NO	0	0	71	95	2	1	0	1	mild	0	0	1	severe	3	10 mg metoclopramide hydrochloride	/
AZA	F	40	1	160	61	23.83	92/62	63	NO	61	610	40	19	950	NO	NO	0	0	82	117	3	2	0	0	0	2	4	1	severe	0	10 mg metoclopramide hydrochloride	/
AZA	F	32	1	156	55	22.6	109/78	72	NO	87	870	45	28	1400	NO	NO	0	0	144	166	3	3	0	0	0	3	0	0	0	2	10 mg metoclopramide hydrochloride	Parecoxib sodium 40 mg
AZA	F	53	2	151	52	22.81	95/60	65	NO	47	470	25	15.6	780	NO	NO	0	0	100	117	2	0	0	0	0	2	0	0	0	2	/	/
AZA	M	57	2	170	65	22.49	115/70	65	NO	60.5	605	30	14.2	710	NO	NO	0	0	78	98	2	0	0	0	0	0	0	0	0	0	/	/
AZA	F	55	2	160	61	23.83	124/80	80	NO	70	700	35	25	1250	NO	YES(57bpm)	0.2	0	120	136	5	0	0	0	0	4	0	0	0	3	10 mg metoclopramide hydrochloride	Parecoxib sodium 40 mg
AZA	F	24	1	168	62	21.97	106/65	73	NO	58	580	30	13	650	NO	NO	0	0	72	97	2	0	0	1	severe	2	3	3	severe	2	10 mg metoclopramide hydrochloride	/
AZA	F	29	1	166	50	18.14	112/72	68	NO	60	600	30	14.3	715	NO	YES(52bpm)	0.3	0	80	105	2	1	0	0	0	0	0	0	0	2	/	/
AZA	F	47	2	161	64	24.69	103/64	70	NO	38	380	20	7.6	380	NO	NO	0	0	43	60	2	1	0	0	0	0	0	2	mild	2	/	/
AZA	F	37	1	158	57	22.83	114/92	72	NO	77	770	40	20.6	1030	NO	NO	0	0	139	153	3	2	0	0	0	1	0	0	0	1	/	/
AZA	M	45	2	178	77	24.3	114/77	65	NO	65	650	35	19	950	NO	YES(51bpm)	0.3	0	90	100	1	1	0	0	0	1	0	0	0	1	/	/
AZA	F	57	2	157	56	22.72	110/70	92	NO	49	490	30	10.2	510	NO	NO	0	0	90	107	3	0	0	1	mild	1	0	0	0	1	/	/
AZA	F	54	2	160	70	27.34	131/82	67	NO	55	550	30	10	500	NO	NO	0	0	32	96	2	2	0	0	0	1	0	0	0	1	/	/
AZA	F	39	2	165	67	24.61	110/72	83	NO	122.6	1226	45	37.1	1855	NO	NO	0	0	238	258	2	0	0	1	severe	0	2	1	severe	1	10 mg metoclopramide hydrochloride	/
AZA	F	30	2	163	50	18.82	123/80	68	NO	50	500	40	24.3	1215	NO	NO	0	6	110	130	2	1	0	0	0	1	3	0	0	1	10 mg metoclopramide hydrochloride	/
AZA	F	44	2	163	48	18.07	126/86	84	NO	54	540	35	13.6	680	NO	NO	0	0	113	125	2	2	0	1	severe	0	0	0	0	1	10 mg metoclopramide hydrochloride	/
AZA	F	49	2	156	55	22.6	136/75	73	NO	49	490	40	14	700	NO	NO	0	0	60	79	2	0	0	0	0	1	3	1	severe	3	10 mg metoclopramide hydrochloride	/
AZA	F	47	2	156	55	22.6	107/68	70	NO	42.7	427	40	12.3	615	NO	NO	0	0	69	81	1	2	0	0	0	1	0	0	0	1	/	/
AZA	F	24	1	168	56	19.84	130/87	110	NO	58.7	587	30	19.4	970	NO	NO	0	0	110	124	2	3	0	0	0	1	0	0	0	1	/	/
AZA	F	40	2	161	54	20.83	118/82	98	NO	54	540	30	10.7	535	NO	NO	0	0	83	96	2	0	0	0	0	2	0	0	0	2	/	/
AZA	F	47	2	166	62	22.5	119/81	66	Motion sickness	46.5	465	35	23.2	1160	NO	YES(55bpm)	0.3	0	117	139	2	1	0	0	0	3	0	0	0	1	/	/
AZA	F	55	2	160	52	20.31	138/77	78	NO	55	550	35	12.8	640	NO	NO	0	0	87	117	1	2	0	1	mild	1	0	0	0	3	/	/
AZA	M	31	2	175	65	21.22	122/87	78	Smoker	64	640	30	15.3	765	NO	NO	0	0	103	123	2	2	0	0	0	0	0	0	0	1	/	/
AZA	F	39	2	164	57	21.19	109/78	70	NO	38	380	30	8.1	405	NO	NO	0	0	55	74	2	1	0	0	0	0	0	0	0	1	/	/
AZA	F	35	2	158	55	22.03	123/80	83	NO	43.8	438	20	8.8	440	NO	NO	0	6	55	82	2	1	0	0	0	0	0	0	0	1	/	/
AZA	F	31	2	155	51	21.23	99/62	74	NO	82	820	40	27	1350	NO	NO	0	0	150	167	2	0	0	0	0	0	0	0	0	2	/	/
AZA	F	32	2	158	56	22.43	135/70	95	NO	72	720	30	19.7	985	NO	NO	0	0	100	126	3	2	2	1	severe	0	0	0	0	3	10 mg metoclopramide hydrochloride	/
AZA	M	50	2	172	71	24	117/78	70	NO	60	600	25	16	800	YES(87/58mmHg）	NO	0	12	90	100	2	1	0	0	0	0	0	0	0	2	/	/
AZA	M	51	2	172	65	21.97	114/81	86	NO	44.1	441	35	7.7	385	NO	NO	0	0	60	78	2	0	0	0	0	0	0	1	mild	2	/	/
AZA	F	38	2	164	60	22.31	112/69	83	NO	37.4	374	30	12.9	645	NO	NO	0	0	72	74	2	2	0	0	0	0	0	0	0	1	/	/
AZA	F	43	2	157	50	20.28	114/70	70	NO	36.4	364	35	20.2	1010	NO	NO	0	6	95	105	2	0	0	0	0	2	0	0	0	3	/	Parecoxib sodium 40 mg
AZA	F	30	1	163	51	19.2	100/62	63	NO	46.4	464	20	17.9	895	NO	NO	0	0	108	120	2	1	0	1	mild	1	0	0	0	2	/	/
AZA	F	52	2	160	60	23.44	119/85	83	Motion sickness	51.1	511	30	11	550	NO	NO	0	0	82	98	3	2	0	0	0	2	0	0	0	3	/	/
AZA	M	26	1	175	83	27.1	125/85	74	NO	77.1	771	40	27.1	1355	NO	NO	0	0	115	135	2	0	0	0	0	0	2	1	mild	2	10 mg metoclopramide hydrochloride	/
AZA	F	41	2	159	57	22.55	144/89	79	Motion sickness	49.5	495	30	9.9	495	NO	NO	0	0	72	89	3	2	0	0	0	1	0	0	0	1	/	/
AZA	M	52	2	175	74	24.16	135/85	71	Motion sickness	32.4	324	25	9	450	NO	NO	0	0	56	66	2	0	0	0	0	0	0	0	0	2	/	/
AZA	F	46	2	158	61	24.44	143/81	101	Motion sickness	62.7	627	25	20.4	1020	NO	NO	0	0	139	160	2	2	1	0	0	0	1	0	0	1	10 mg metoclopramide hydrochloride	/
AZA	F	34	1	160	54	21.09	114/74	87	Motion sickness	64	640	35	14.3	715	NO	NO	0	12	108	128	3	0	0	0	0	2	0	0	0	3	/	/
AZA	F	27	1	159	55	21.76	123/83	72	Motion sickness	62	620	30	20	1000	NO	NO	0	0	180	199	2	2	0	0	0	3	0	0	0	1	/	/
AZA	M	30	2	185	92	26.88	126/76	81	NO	88	880	35	20.7	1035	NO	NO	0	0	121	131	2	1	0	0	0	3	0	0	0	2	/	/
AZA	M	30	2	175	86	28.08	139/86	89	NO	52.7	527	40	21.6	1080	NO	NO	0	0	73	85	3	1	0	0	0	1	2	0	0	1	10 mg metoclopramide hydrochloride	/
AZA	F	53	2	160	55	21.48	135/90	89	NO	57	570	30	16	800	NO	NO	0	0	101	114	2	0	0	0	0	1	0	0	0	1	/	/
AZA	F	53	2	152	65	28.13	141/84	84	NO	66	660	35	15	750	NO	NO	0	0	75	92	2	0	0	0	0	2	0	0	0	0	/	/
AZA	F	25	1	158	51	20.43	110/76	89	Motion sickness	49	490	30	11.6	580	NO	NO	0	0	75	95	2	2	0	0	0	1	0	0	0	2	/	/
AZA	F	32	1	153	43	18.37	96/61	77	NO	50.5	505	35	11.9	595	NO	NO	0	0	65	80	2	3	1	0	0	1	1	0	0	1	10 mg metoclopramide hydrochloride	/
AZA	M	48	2	170	68	23.53	139/90	83	Smoker	73.4	734	45	20.3	1015	NO	NO	0	0	110	122	2	0	0	0	0	2	0	1	severe	3	10 mg metoclopramide hydrochloride	/
AZA	F	46	2	162	70	26.67	120/80	67	NO	55	550	40	17.6	880	NO	NO	0	0	126	136	3	0	0	0	0	2	0	0	0	3	/	/
AZA	F	42	2	167	70	25.1	121/82	84	NO	58.7	587	40	18.9	945	NO	NO	0	0	90	105	2	2	0	1	mild	0	0	0	0	1	/	/
AZA	F	52	2	160	60	23.44	124/83	62	Motion sickness	60	600	35	19.9	995	NO	NO	0	0	123	144	2	1	0	0	0	0	1	0	0	0	/	/
AZA	F	32	1	155	50	20.81	120/86	104	NO	45.8	458	30	11.5	575	NO	NO	0	0	78	90	3	2	0	0	0	3	0	0	0	3	/	Parecoxib sodium 40 mg
AZA	F	40	2	163	57	21.45	130/76	99	NO	53	530	35	12	600	NO	NO	0	0	76	86	2	0	0	0	0	2	0	0	0	2	/	/
AZA	F	52	2	158	62	24.84	106/67	68	Motion sickness	65.8	658	45	25	1250	NO	NO	0	12	96	120	2	1	0	0	0	3	5	0	0	3	10 mg metoclopramide hydrochloride	/
AZA	F	47	2	160	52	20.31	158/106	78	Motion sickness	83	830	30	15.3	765	NO	NO	0	0	177	184	2	2	0	1	mild	2	0	0	0	3	/	/
AZA	M	37	1	174	59	19.49	106/61	65	NO	55.2	552	35	10.8	540	NO	NO	0	0	84	104	2	2	0	0	0	1	0	0	0	2	/	/
AZA	F	31	1	166	67	24.31	111/76	104	Motion sickness	66.3	663	35	15.9	795	NO	NO	0	0	106	118	2	1	0	0	0	2	0	1	severe	2	10 mg metoclopramide hydrochloride	/
AZA	F	55	2	156	62	25.48	138/90	75	Motion sickness	55.5	555	30	17.8	890	NO	NO	0	0	85	97	2	0	0	0	0	2	1	1	mild	3	/	/
AZA	M	47	2	173	88	29.4	140/86	72	NO	65.3	653	45	32.6	1630	NO	NO	0	0	115	140	2	0	0	0	0	1	0	0	0	0	/	/
AZA	F	56	2	160	65	25.39	110/68	70	NO	63.6	636	45	21.3	1065	NO	YES(55bpm)	0.3	0	95	110	3	1	0	0	0	3	0	1	mild	3	/	/
AZA	F	47	2	156	52	21.37	116/76	82	Motion sickness	41	410	30	7.9	395	NO	NO	0	0	44	70	2	0	0	0	0	2	0	0	0	3	/	/
AZA	F	32	2	170	76	26.3	114/80	97	NO	50.7	507	35	14.5	725	NO	NO	0	0	80	100	2	1	0	0	0	2	0	0	0	2	/	/
AZA	M	42	2	174	70	23.12	101/70	75	Smoker	62	620	30	14	700	YES(89/50mmHg）	NO	0	12	90	115	5	0	0	0	0	1	0	0	0	1	/	/
AZA	F	31	2	164	76	28.26	145/88	81	Motion sickness	70.7	707	35	22.5	1125	NO	NO	0	0	107	130	3	1	0	0	0	1	0	0	0	2	/	/
AZA	F	54	2	158	48	19.23	133/79	71	Motion sickness	40	400	25	12	600	NO	NO	0	0	70	77	2	0	0	0	0	3	0	0	0	3	/	/
AZA	F	52	2	160	65	25.39	117/69	63	Motion sickness	90	900	40	30.5	1525	NO	NO	0	0	158	176	3	0	0	0	0	3	0	0	0	3	/	/
AZA	F	28	1	167	57	20.44	121/74	57	NO	60	600	30	17	850	NO	NO	0	0	65	89	2	2	0	0	0	3	0	0	0	3	/	/
AZA	M	30	2	180	82	25.31	119/89	84	Smoker	75	750	45	17.6	880	NO	YES(50bpm)	0.5	0	90	110	2	1	0	0	0	1	0	0	0	2	/	/
AZA	F	26	1	162	75	28.58	121/72	89	NO	67.6	676	35	19.1	955	NO	NO	0	0	122	165	2	0	0	0	0	2	0	0	0	2	/	/
AZA	F	51	2	150	54	24	139/95	75	Motion sickness	48.8	488	25	12.3	615	NO	NO	0	0	63	77	2	0	0	0	0	1	0	0	0	0	/	/
AZA	F	34	1	164	75	27.89	131/91	84	NO	115	1150	45	40	2000	NO	NO	0	0	158	179	2	1	0	0	0	1	0	0	0	1	/	/
AZA	F	40	1	160	51	19.92	110/71	74	NO	69	690	30	15.4	770	NO	NO	0	6	100	112	5	1	0	0	0	1	0	0	0	2	/	/
AZA	M	33	1	178	69	21.78	125/91	77	NO	73	730	35	13.8	690	NO	NO	0	0	97	124	3	1	0	0	0	2	0	0	0	2	/	/
AZA	M	29	1	178	75	23.67	121/76	80	NO	56.5	565	35	22.3	1115	NO	NO	0	0	80	97	2	0	0	0	0	2	0	0	0	2	/	/
AZA	M	43	2	173	75	25.06	135/96	78	NO	76	760	35	20.7	1035	NO	NO	0	0	120	144	2	1	0	0	0	2	0	0	0	2	/	/
AZA	F	54	2	158	52	20.83	125/76	69	Motion sickness	48	480	30	13.6	680	NO	YES(57bpm)	0.3	0	67	84	2	1	0	0	0	0	2	0	0	1	10 mg metoclopramide hydrochloride	/
AZA	F	27	1	158	54	21.63	127/89	84	Motion sickness	41	410	30	12.5	625	NO	NO	0	0	59	77	2	0	1	0	0	1	1	0	0	2	10 mg metoclopramide hydrochloride	/
AZA	F	44	1	162	58	22.1	122/88	71	NO	45.5	455	35	9.4	470	NO	YES(59bpm)	0.3	0	70	81	2	0	0	1	mild	2	0	0	0	2	/	/
AZA	F	39	2	153	61	26.06	107/69	75	Motion sickness	52.1	521	35	18.9	945	NO	NO	0	0	107	125	2	0	0	0	0	2	0	0	0	2	/	/
AZA	F	28	1	166	68	24.68	117/81	68	NO	48.3	483	30	23.1	1155	NO	NO	0	0	75	85	2	0	0	0	0	2	0	0	0	1	/	/
AZA	M	34	2	168	76	26.93	130/79	70	NO	56.7	567	35	22.3	1115	NO	NO	0	0	73	85	2	1	0	0	0	3	2	0	0	2	10 mg metoclopramide hydrochloride	/
AZA	F	50	2	166	69	25.04	146/83	98	Motion sickness	47.6	476	35	9.6	480	NO	NO	0	0	58	75	2	1	0	0	0	2	0	0	0	2	/	/
AZA	F	48	2	160	65	25.39	122/80	66	NO	54.4	544	35	12.1	605	NO	NO	0	0	67	85	2	2	0	0	0	2	2	0	0	2	10 mg metoclopramide hydrochloride	/
AZA	F	53	2	166	58	21.05	113/72	70	NO	40.5	405	30	7	350	NO	NO	0	0	42	62	2	0	1	0	0	1	1	0	0	1	10 mg metoclopramide hydrochloride	/
